# Supplementary material for: H2AX facilitates classical non-homologous end joining at the expense of limited nucleotide loss at repair junctions
Source: PubMed Central journal article supplement — Nucleic Acids Res. 2017 Aug 10;45(18):10614–33. doi: 10.1093/nar/gkx715 (PMC5737864; doi:10.1093/nar/gkx715), 2017-08-10
Supplement: gkx715_supp.pdf [file gkx715_supp.pdf]

# Supplementary Figure 1

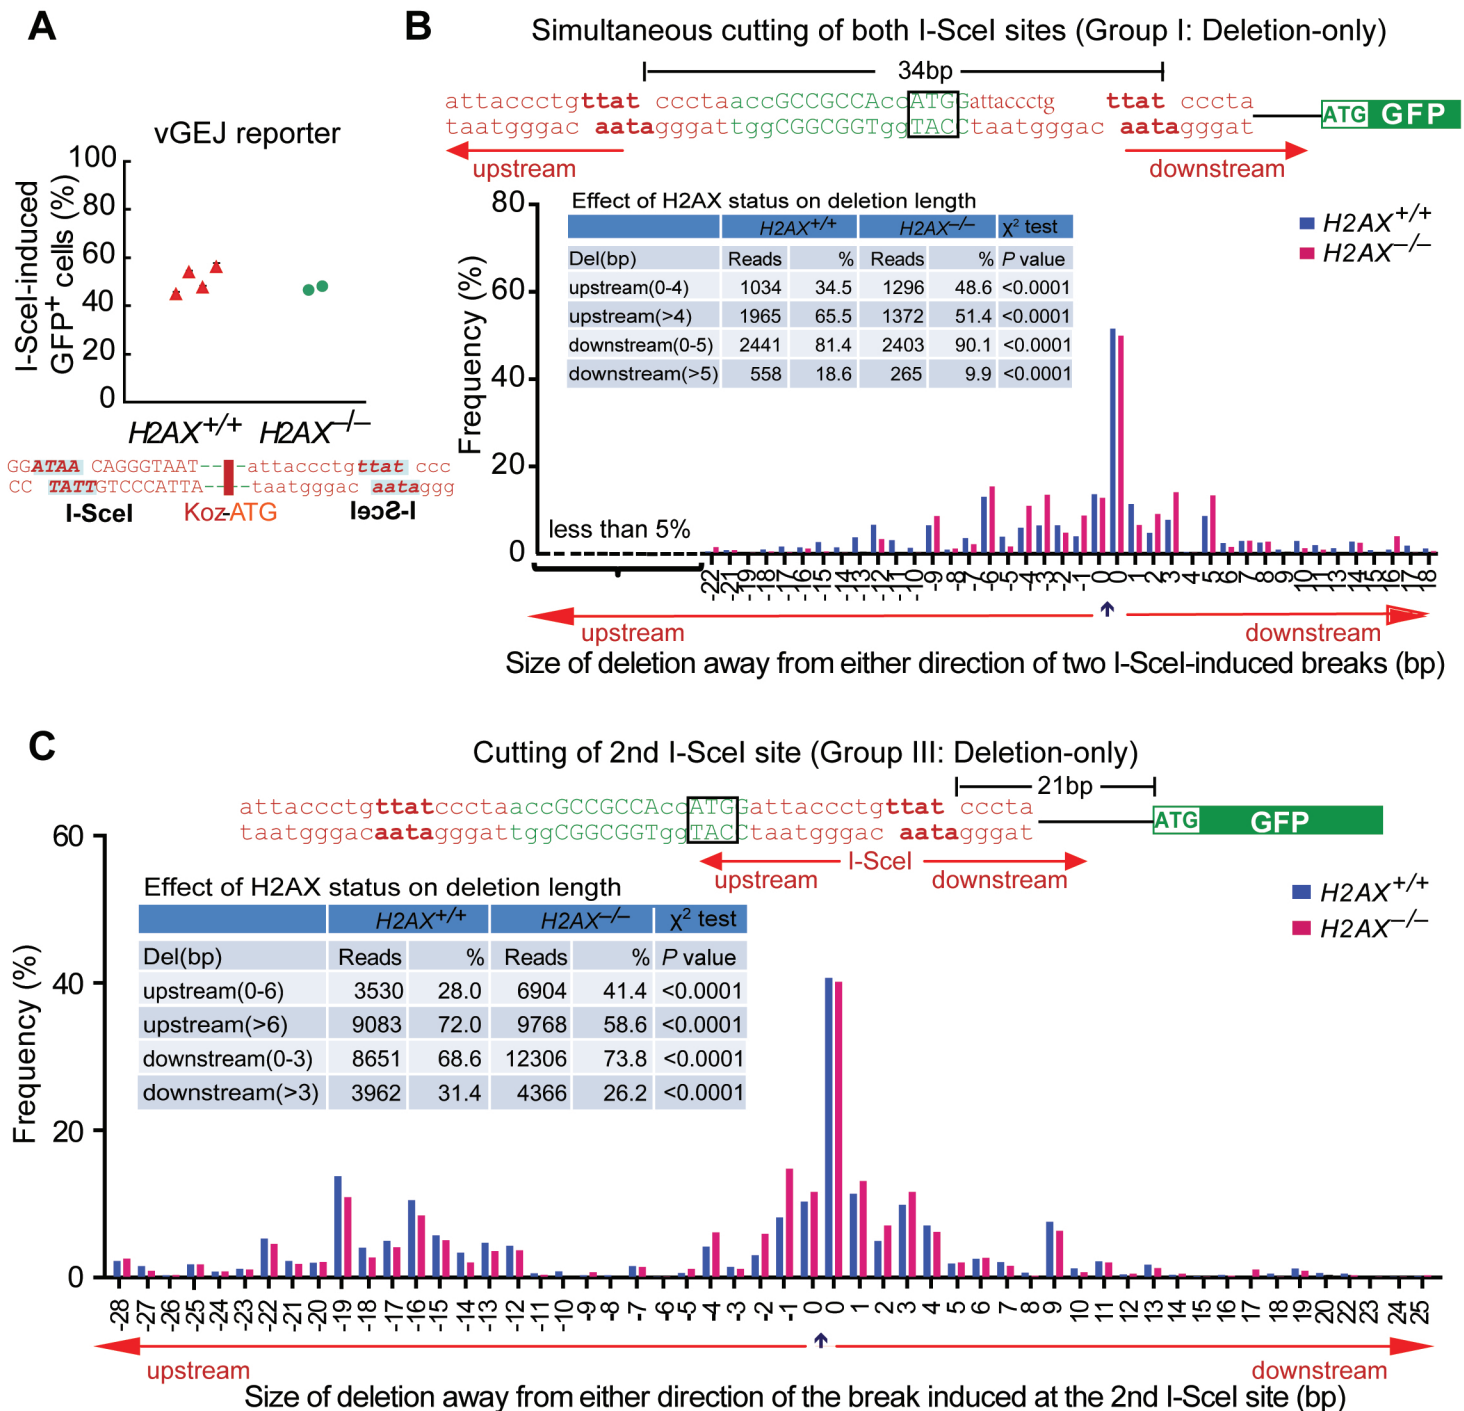

**Supplementary Figure 1.** The bias towards shorter deletion caused by *H2AX* deficiency is bi-directional. **(A)** Percentage of I-SceI-induced GFP<sup>+</sup> cells from *H2AX*<sup>+/+</sup> and *H2AX*<sup>-/-</sup> vGEJ reporter mouse ES cells. Tandem I-SceI sites in vGEJ are invertedly positioned as indicated. **(B and C)** Frequency of deletions with different deletion sizes away from either direction of the breaks induced simultaneously at both I-SceI site (Group I; **B**) and at the second I-SceI site (Group III; **C**) from mouse *H2AX*<sup>+/+</sup> and *H2AX*<sup>-/-</sup> ES cells. Only deletion-only events are shown here. “↑” indicates the site of the break. Deletion directions “upstream” and “downstream” are also indicated. The deletion-only NHEJ events were grouped into upstream (0-4bp), upstream (>4bp), downstream (0-5bp), and downstream (>5bp) in **(B)** and upstream (0-6bp), upstream (>6bp), downstream (0-3bp), and downstream (>3bp) in **(C)**. The combined reads and frequencies of these groups were summarized in inset. *P* values from a  $\chi^2$  test are indicated. The sequence around two I-SceI sites is shown on the top of each chart with two I-SceI sites in red and the “Koz-ATG” start codon highlighted with black box.

## Supplementary Figure 2

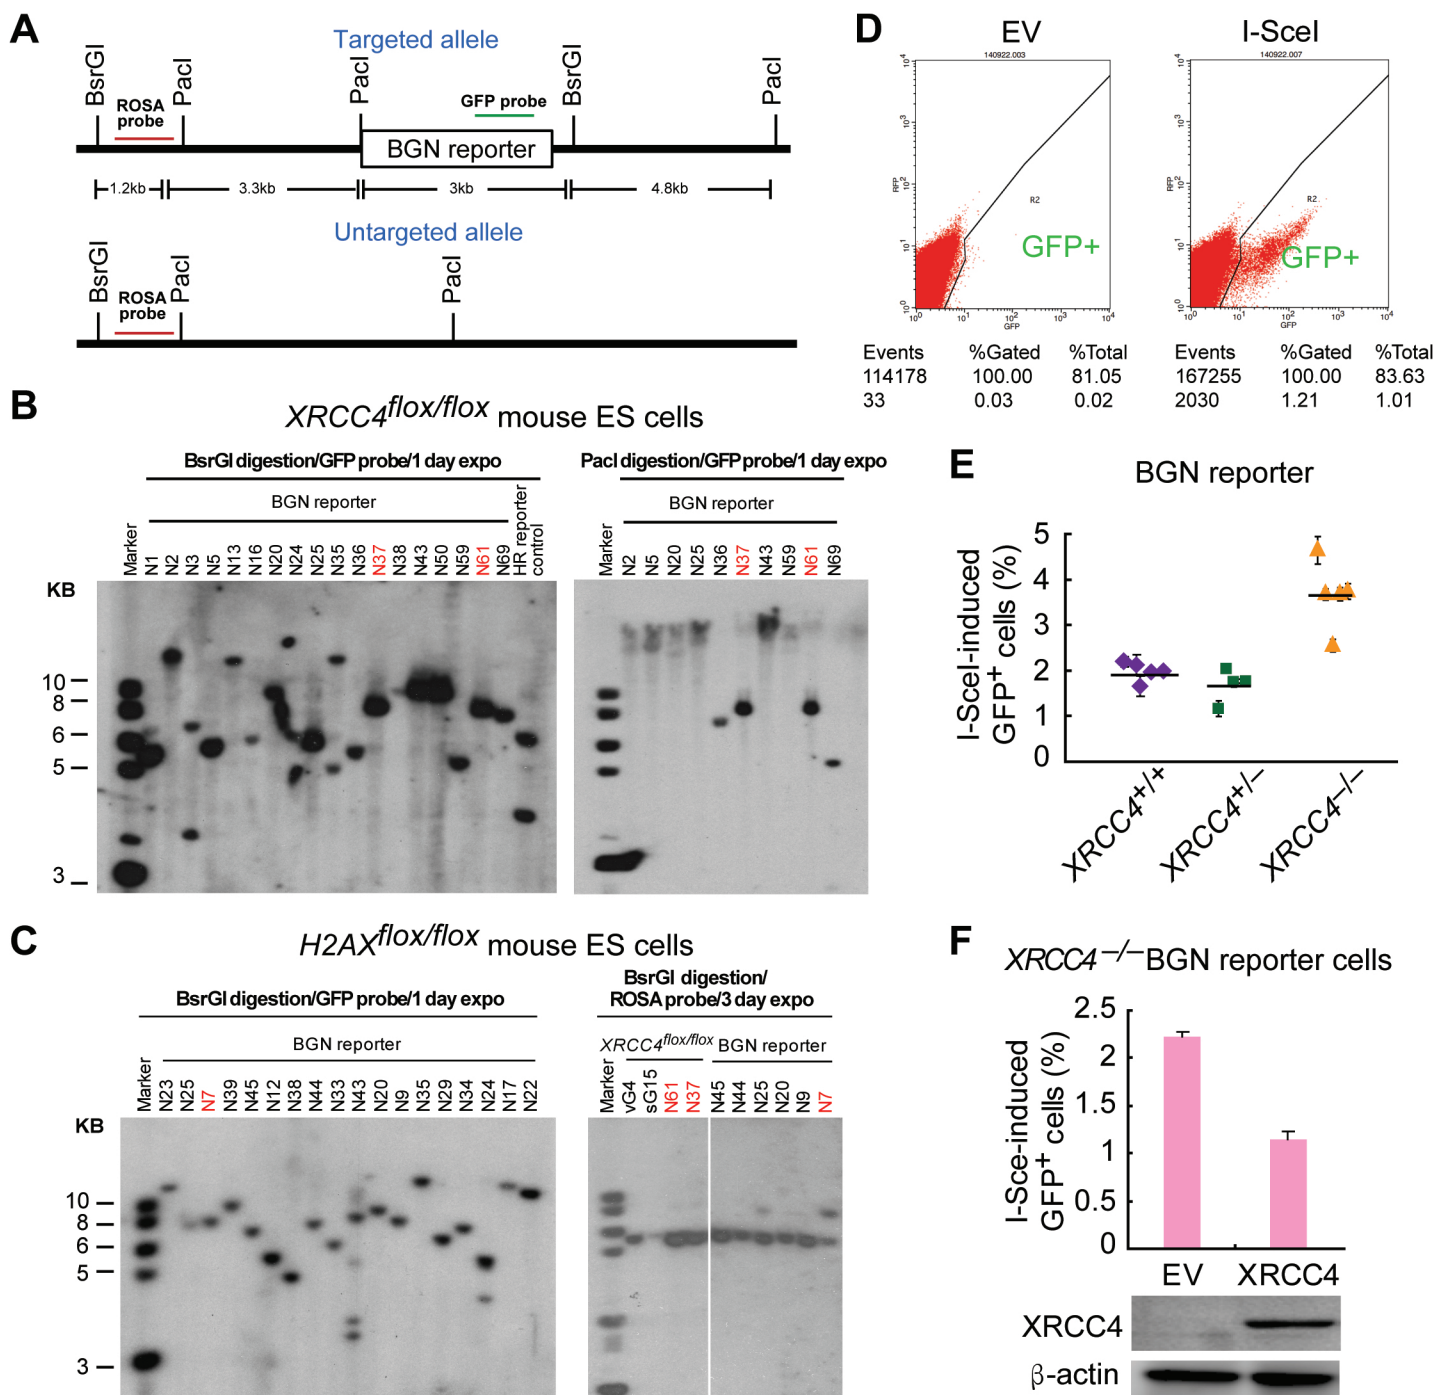

**Supplementary Figure 2.** Generation of *XRCC4<sup>flox/flox</sup>* and *H2AX<sup>flox/flox</sup>* BGN reporter mouse ES cells. **(A)** Schematic diagram of mouse *ROSA26* alleles targeted and untargeted with the BGN reporter. *ROSA* probe (red) and *GFP* probe (green) for Southern blot were indicated. **(B)** Southern blot demonstrating the integration of single-copy, intact BGN reporter into the genome of *XRCC4<sup>flox/flox</sup>* mouse ES cells. gDNA were digested with *BsrGI* or *PacI* and hybridized with *GFP* probe. Clone N37 and N61 generated a single band indicating integration of single-copy BGN reporter. **(C)** Southern blot illustrating the targeting of the BGN reporter into the *ROSA26* locus of *H2AX<sup>flox/flox</sup>* mouse ES cells. gDNA were digested with *BsrGI* and hybridized by the *GFP* and *ROSA* probe. Clone N7 generated a ~8kb single band with the *GFP* probe and two bands (~5.5kb and ~8kb) with the *ROSA* probe indicating targeting of single-copy BGN reporter into the *ROSA26* locus. *XRCC4<sup>flox/flox</sup>* mouse ES clones N61 and N37 generated only a single band (~5.5kb) with the *ROSA* probe indicating no *ROSA26* targeting of the BGN reporter. **(D)** Examples of flow cytometry analysis of I-SceI-induced mNHEJ in mouse ES cells carrying the BGN reporter.

Reporter cells were transfected with I-SceI expression plasmids and empty vector (EV) as control and analyzed by flow cytometry 72h post-transfection. The percentages along with analysis parameters are indicated under the graph. (E) Percentage of I-SceI-induced GFP<sup>+</sup> cells from *XRCC4*<sup>+/+</sup>, *XRCC4*<sup>+/-</sup> and *XRCC4*<sup>-/-</sup> BGN reporter cell clones. Bars represent the mean±S.D. of three independent experiments, each performed in triplicates. One-way Anova: NS between “*XRCC4*<sup>+/+</sup>” and “*XRCC4*<sup>+/-</sup>”; *P*=0.001 between “*XRCC4*<sup>+/+</sup>” and “*XRCC4*<sup>+/-</sup>”. (F) Percentage of I-SceI-induced GFP<sup>+</sup> cells from *XRCC4*<sup>-/-</sup> BGN reporter cells transiently transfected with mouse *XRCC4* expression plasmids. Bars represent the mean±S.D. of three independent experiments, each in triplicates. Student’s paired t-test: *P*=0.004 between “EV” and “*XRCC4*”. Expression of exogenous *XRCC4* was detected by Western blot as indicated.

### Supplementary Figure 3

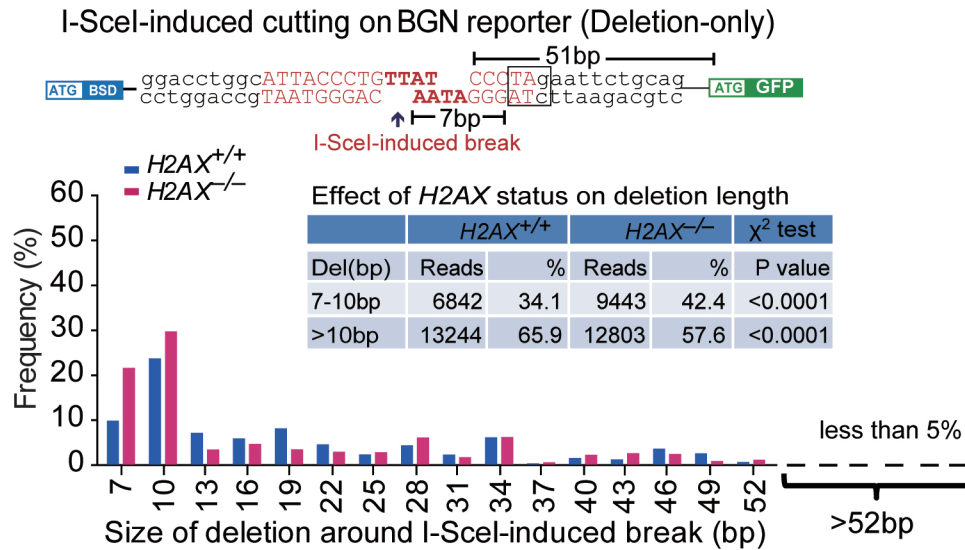

**Supplementary Figure 3.** Frequency of deletions with different deletion length in “Del” events of I-SceI-induced mNHEJ at the BGN reporter from *H2AX*<sup>+/+</sup> and *H2AX*<sup>-/-</sup> mouse ES cells. The mNHEJ events were grouped into 7-10bp and >10bp, and their combined reads and frequencies summarized in inset with *P* values from a  $\chi^2$  test indicated. The sequence surrounding the I-SceI site (red) in the BGN reporter is shown with the “TAG” stop codon highlighted in black box. The distance between I-SceI-induced breakage site and the GFP start codon “ATG” is 51bp as indicated.

## Supplementary Figure 4

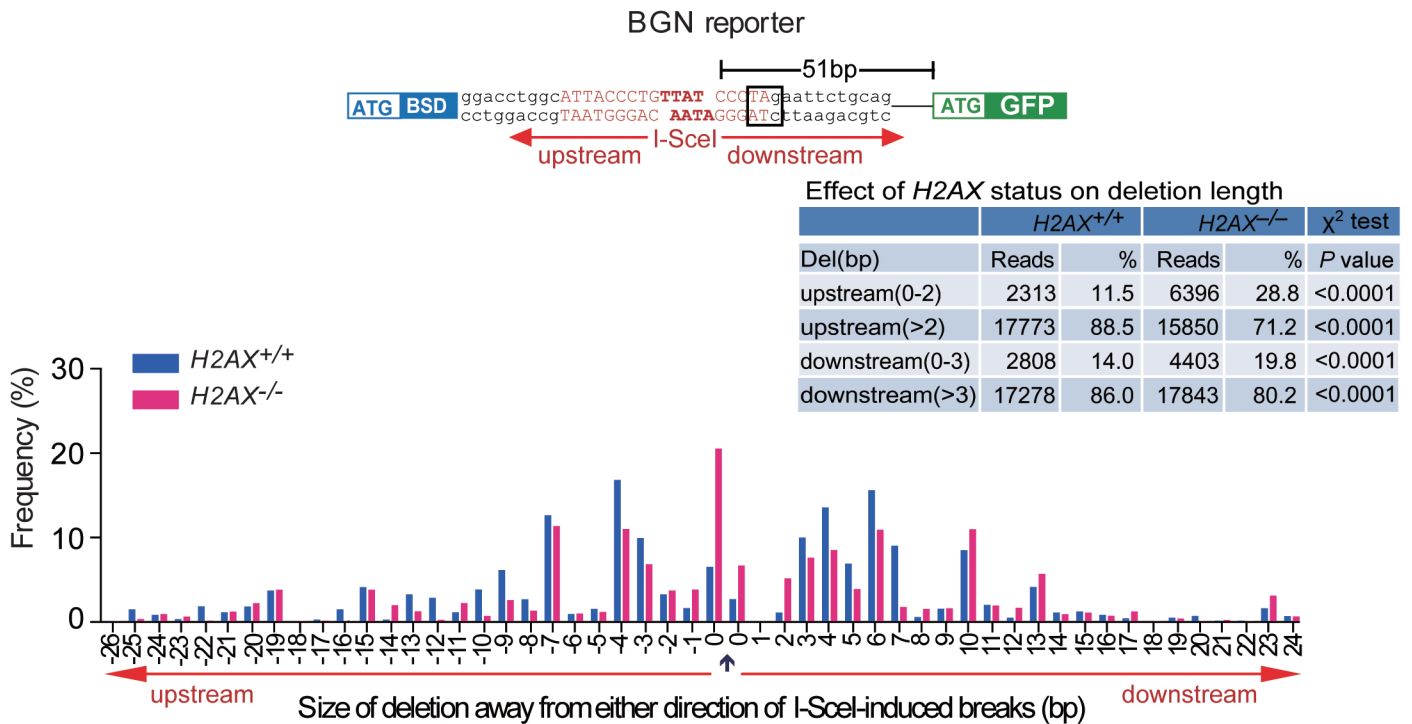

**Supplementary Figure 4.** Frequency of deletions with different deletion sizes away from either direction of the I-SceI-induced break at the BGN reporter from *H2AX*<sup>+/+</sup> and *H2AX*<sup>-/-</sup> mouse ES cells. The sequence around the I-SceI site of the BGN reporter is shown on the top of the chart with the I-SceI site in red and the “TAG” stop codon in black box. The 51bp distance between I-SceI-induced breakage site and the GFP start codon “ATG” is indicated, and the deletion distributions demonstrate the sizes of most deletions are within 51bp from either direction. Only deletion-only events are shown here. “↑” indicates the site of the break. Deletion directions “upstream” and “downstream” are also indicated. The deletion-only NHEJ events were grouped into upstream (0-2bp), upstream (>2bp), downstream (0-3bp), and downstream (>3bp). The combined reads and frequencies of these groups were summarized in inset. *P* values from a  $\chi^2$  test are indicated.

## Supplementary Figure 5

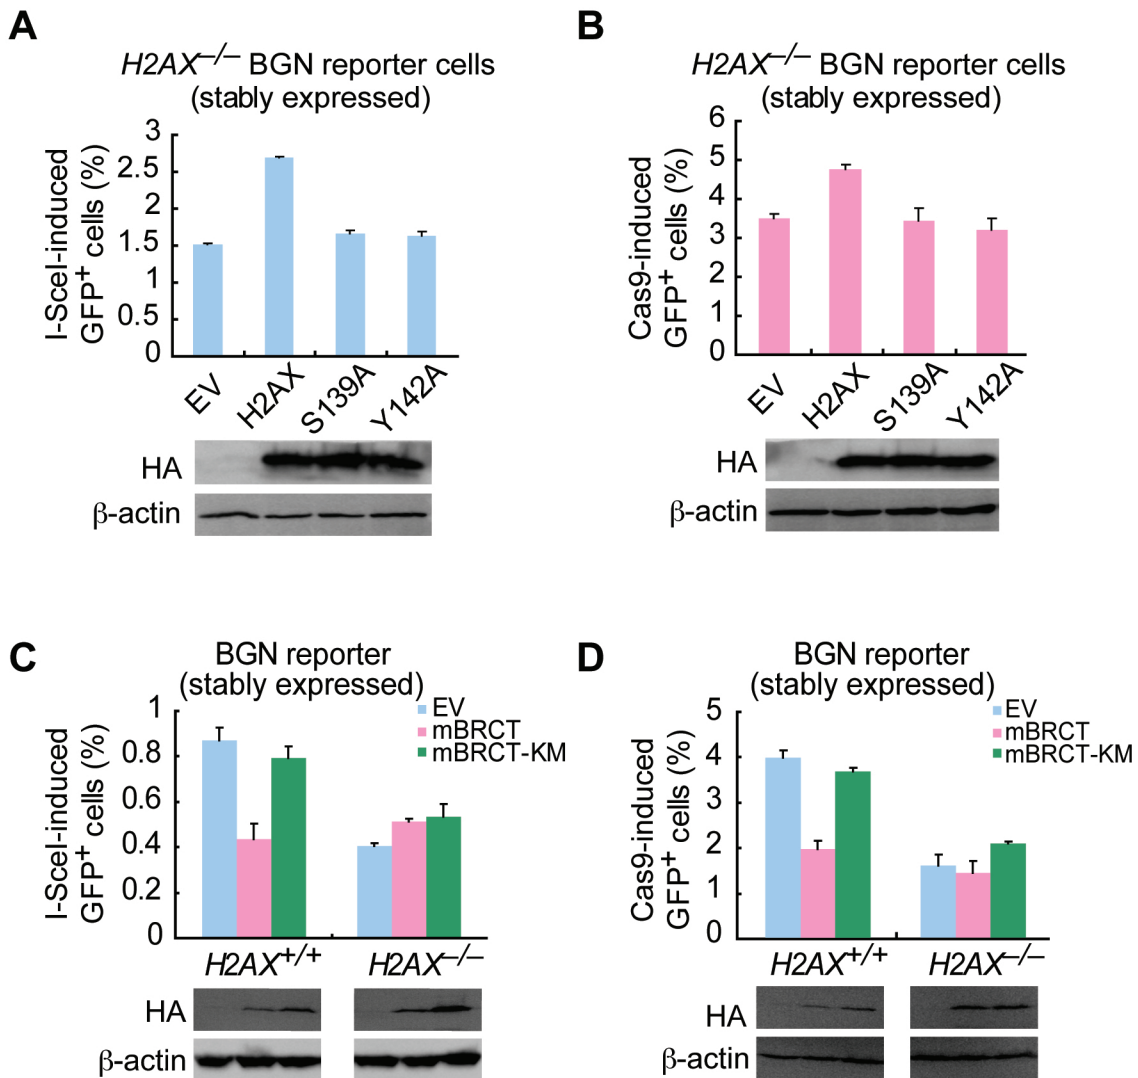

**Supplementary Figure 5.** Function of H2AX in mNHEJ requires  $\gamma$ H2AX/MDC1 signaling. (**A** and **B**) Percentage of I-SceI (**A**) or Cas9 (**B**)-induced GFP<sup>+</sup> cells from *H2AX*<sup>-/-</sup> BGN reporter cells stably transfected with mouse H2AX expression plasmids. Bars represent the mean $\pm$ S.D. of three independent experiments, each performed in triplicates. In I-SceI-induced NHEJ assays (**A**), Student's paired t-test:  $P=0.014$  between "EV" and "WT";  $P=0.039$  between "WT" and "S139A"; and  $P=0.004$  between "WT" and "Y142A". In Cas9-induced NHEJ assays (**B**), Student's paired t-test:  $P=0.047$  between "EV" and "WT";  $P=0.039$  between "WT" and "S139A"; and  $P=0.048$  between "WT" and "Y142A". Exogenous HA-tagged H2AX and its variants were detected by Western blot as indicated. (**C** and **D**) Percentage of I-SceI (**C**) or Cas9 (**D**)-induced GFP<sup>+</sup> cells from *H2AX*<sup>+/+</sup> and *H2AX*<sup>-/-</sup> BGN reporter cells stably transfected with EV, HA-tagged mBRCT or mBRCT-KM expression plasmids. Bars represent the mean $\pm$ S.D. of three independent experiments, each performed in triplicates. Student's paired t-test between "EV" and "mBRCT" in *H2AX*<sup>+/+</sup> BGN reporter cells:  $P=0.005$  in I-SceI-induced NHEJ assays (**C**) and  $P=0.0003$  in Cas9-induced NHEJ assays (**D**); between "EV" and "mBRCT" in *H2AX*<sup>-/-</sup> BGN reporter cells and between "EV" and "mBRCT KM" in both *H2AX*<sup>+/+</sup> and *H2AX*<sup>-/-</sup> BGN reporter cells: NS. Exogenous HA-tagged mBRCT proteins detected by Western blot as indicated.

## Supplementary Figure 6

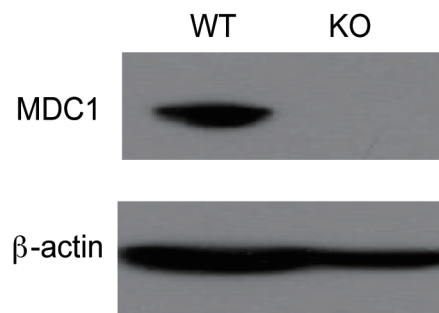

WT. CAGGTGATTGAC.....ACTATCCAGTGGCTCCTT  
KO  $\Delta$ 52bp. CAGG-----CTT

**Supplementary Figure 6.** Generation of *MDC1* knockout mouse ES cells by CRISPR/Cas9. Mouse ES cells were transfected twice with Cas9 expression plasmids and *MDC1* gRNA plasmids, and then plated on MEF. In about 2 weeks, individual clones were picked, and deletion of *MDC1* in one *MDC1* knockout clone was verified by Western blot (upper) and by Sanger sequencing of the edited site (lower).

## Supplementary Figure 7

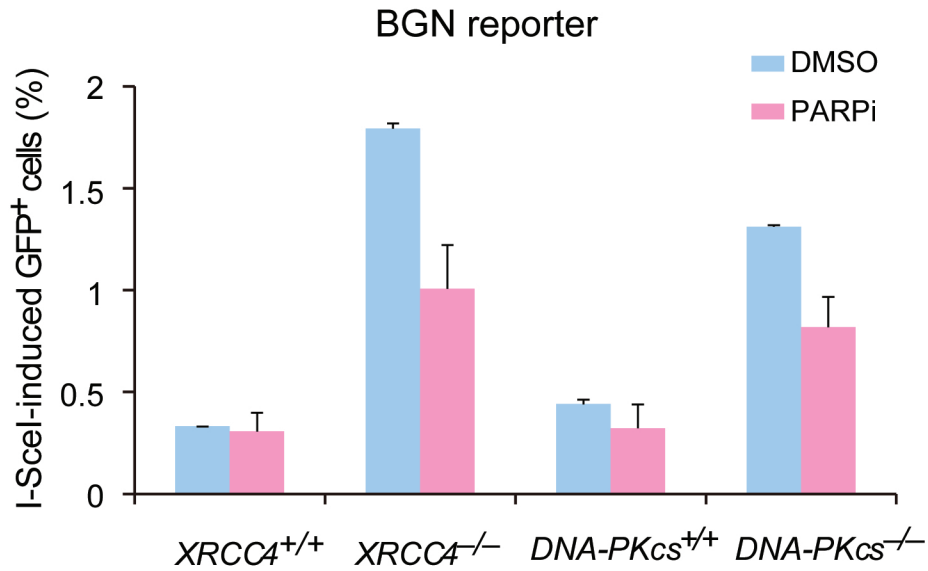

**Supplementary Figure 7.** Effect of the PARP inhibitor (PARPi) Olaparib (2uM) on I-SceI-induced mNHEJ in *XRCC4*<sup>+/+</sup>, *XRCC4*<sup>-/-</sup>, *DNA-PKcs*<sup>+/+</sup> and *DNA-PKcs*<sup>-/-</sup> BGN reporter cells. Bars represent the mean±S.D. of three independent experiments, each in triplicates. Student's paired t-test:  $P < 0.05$  between "DMSO" and "PARPi" in both *XRCC4*<sup>-/-</sup> and *DNA-PKcs*<sup>-/-</sup> BGN reporter cells; and NS between "DMSO" and "PARPi" in either *XRCC4*<sup>+/+</sup> or *DNA-PKcs*<sup>+/+</sup> clones.



## Supplementary Figure 8

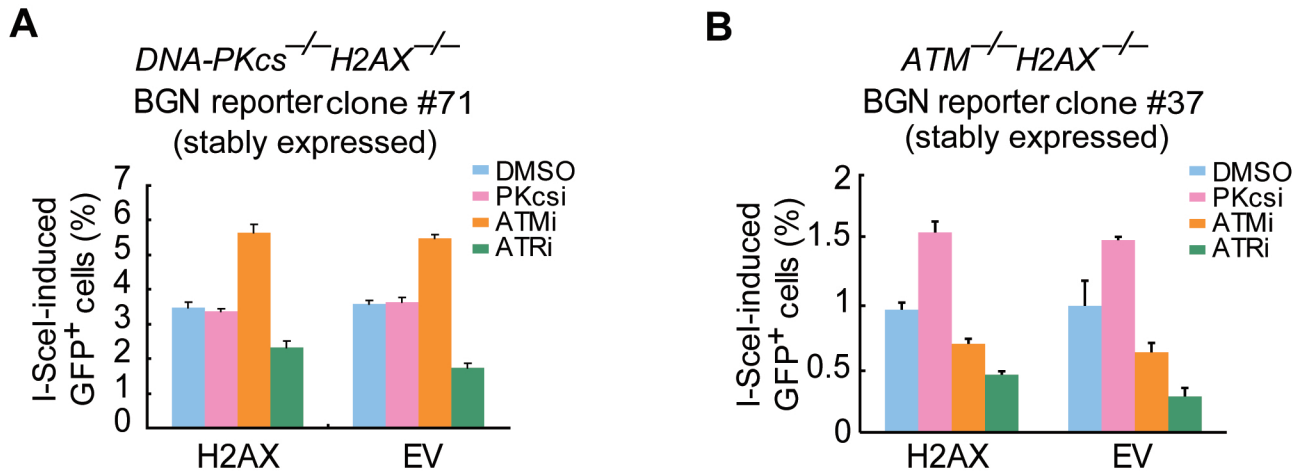

**Supplementary Figure 8.** Effect of DNA-PKcs inhibitor (PKcsi; NU7441), ATM inhibitor (ATMi; KU60019) and ATR inhibitor (ATRi; VE821) on I-SceI-induced mNHEJ in *DNA-PKcs*<sup>-/-</sup>*H2AX*<sup>-/-</sup> H2AX and *DNA-PKcs*<sup>-/-</sup>*H2AX*<sup>-/-</sup>EV BGN reporter cells (**A**), and in *ATM*<sup>-/-</sup>*H2AX*<sup>-/-</sup> H2AX and *ATM*<sup>-/-</sup>*H2AX*<sup>-/-</sup>EV BGN reporter cells (**B**). Bars represent the mean±S.D. of three independent experiments, each in triplicates. Student's paired t-test:  $P < 0.05$  between "DMSO" and "ATMi" and NS between "DMSO" and "PKcsi" in both *DNA-PKcs*<sup>-/-</sup>*H2AX*<sup>-/-</sup> H2AX and *DNA-PKcs*<sup>-/-</sup>*H2AX*<sup>-/-</sup>EV clones (**A**);  $P < 0.001$  between "DMSO" and "PKcsi" and  $P < 0.05$  between "DMSO" and "ATMi" in both *ATM*<sup>-/-</sup>*H2AX*<sup>-/-</sup> H2AX and *ATM*<sup>-/-</sup>*H2AX*<sup>-/-</sup>EV clones (**B**).

## Supplementary Figure 9

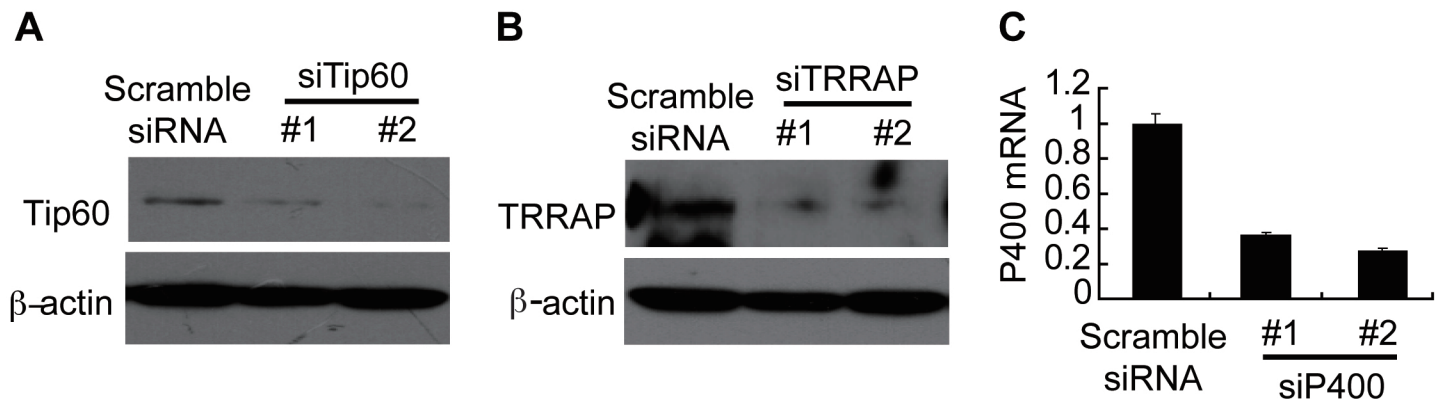

**Supplementary Figure 9.** SiRNA-mediated depletion of the chromatin remodeler Tip60-TRRAP-P400 in BGN reporter mouse ES cells. Mouse ES cells were transfected with scramble siRNA and a pair of siRNAs respectively targeting Tip60 (**A**), TRRAP (**B**) and P400 (**C**), along with I-SceI expression plasmid. Cells were collected and lysed 72h post-transfection for Western blot (**A** and **B**) and for qRT-PCR (**C**) as indicated.

**Supplementary Table 1.** Effect of *H2AX* status on I-SceI-induced NHEJ events in sGEJ reporter mouse ES cells  
(**Del**: mNHEJ events carrying deletions only; **Ins**: mNHEJ events carrying insertions only; **InDel**: mNHEJ events carrying both deletions and insertions.)

| <i>H2AX</i> status            | Reads        |              | %Total of each group |              | %Total reads |             | $\chi^2$ test |
|-------------------------------|--------------|--------------|----------------------|--------------|--------------|-------------|---------------|
|                               | +/+          | -/-          | +/+                  | -/-          | +/+          | -/-         |               |
| <b>Total NHEJ</b>             | <b>52231</b> | <b>71075</b> | <b>-</b>             | <b>-</b>     | <b>100</b>   | <b>100</b>  |               |
| Accurate+naNHEJ               | 31918        | 45934        | -                    | -            | 61.1         | 64.6        | <0.0001       |
| mNHEJ                         | 20313        | 25141        | -                    | -            | 38.9         | 35.4        | <0.0001       |
| <b>Group I (Simultaneous)</b> | <b>35880</b> | <b>49822</b> | <b>100</b>           | <b>100</b>   | <b>68.7</b>  | <b>70.1</b> |               |
| <b>Accurate NHEJ</b>          | <b>30255</b> | <b>43640</b> | <b>84.3</b>          | <b>87.6</b>  | <b>57.9</b>  | <b>61.4</b> | <0.0001       |
| <b>naNHEJ</b>                 | <b>967</b>   | <b>1008</b>  | <b>2.7</b>           | <b>2.0</b>   | <b>1.9</b>   | <b>1.4</b>  | <0.0001       |
| <b>mNHEJ</b>                  | <b>4658</b>  | <b>5174</b>  | <b>13.0</b>          | <b>10.4</b>  | <b>8.9</b>   | <b>7.3</b>  | <0.0001       |
| Del                           | 2999         | 2779         | 8.4                  | 5.6          | 5.7          | 3.9         |               |
| Ins                           | 657          | 736          | 1.8                  | 1.5          | 1.3          | 1.0         |               |
| InDel                         | 1002         | 1659         | 2.8                  | 3.3          | 1.9          | 2.3         |               |
| <b>Group II</b>               | <b>2768</b>  | <b>2950</b>  | <b>100.0</b>         | <b>100.0</b> | <b>5.3</b>   | <b>4.2</b>  |               |
| <b>mNHEJ</b>                  | <b>2768</b>  | <b>2950</b>  | <b>100.0</b>         | <b>100.0</b> | <b>5.3</b>   | <b>4.2</b>  |               |
| Del                           | 2767         | 2950         | 100.0                | 100.0        | 5.3          | 4.2         |               |
| Ins                           | 0            | 0            |                      |              | 0.0          | 0.0         |               |
| InDel                         | 1            | 0            |                      |              | 0.0          | 0.0         |               |
| <b>Group III</b>              | <b>13583</b> | <b>18303</b> | <b>100.0</b>         | <b>100.0</b> | <b>26.0</b>  | <b>25.8</b> |               |
| <b>naNHEJ</b>                 | <b>696</b>   | <b>1286</b>  | <b>5.1</b>           | <b>7.0</b>   | <b>1.3</b>   | <b>1.8</b>  | <0.0001       |
| <b>mNHEJ</b>                  | <b>12887</b> | <b>17017</b> | <b>94.9</b>          | <b>93.0</b>  | <b>24.7</b>  | <b>23.9</b> | <0.0001       |
| Del                           | 12613        | 16672        | 92.9                 | 91.1         | 24.1         | 23.5        |               |
| Ins                           | 197          | 265          | 1.4                  | 1.4          | 0.4          | 0.4         |               |
| InDel                         | 77           | 80           | 0.6                  | 0.4          | 0.1          | 0.1         |               |

**Supplementary Table 2.** Effect of *H2AX* status on Cas9/g2-2-induced NHEJ events in sGEJ reporter mouse ES cells

|              | <i>H2AX</i> <sup>+/+</sup> |      | <i>H2AX</i> <sup>-/-</sup> |      | $\chi^2$ test  |
|--------------|----------------------------|------|----------------------------|------|----------------|
|              | Reads                      | %    | Reads                      | %    | <i>P</i> value |
| <b>Del</b>   | 390266                     | 83.7 | 297876                     | 79.6 | <0.0001        |
| <b>Ins</b>   | 51140                      | 11.0 | 57193                      | 15.2 | <0.0001        |
| <b>InDel</b> | 24997                      | 5.3  | 19325                      | 5.2  | <0.0001        |

**Supplementary Table 3.** Effect of *H2AX* status on I-SceI-induced NHEJ events in BGN reporter mouse ES cells

|              | <i>H2AX</i> <sup>+/+</sup> |      | <i>H2AX</i> <sup>-/-</sup> |      | $\chi^2$ test  |
|--------------|----------------------------|------|----------------------------|------|----------------|
|              | Reads                      | %    | Reads                      | %    | <i>P</i> value |
| <b>Del</b>   | 20086                      | 72.0 | 22246                      | 65.9 | <0.0001        |
| <b>Ins</b>   | 994                        | 3.6  | 509                        | 1.5  | <0.0001        |
| <b>InDel</b> | 6803                       | 24.4 | 10993                      | 32.6 | <0.0001        |

**Supplementary Table 4.** Effect of *H2AX* status on Cas9/g4-2-induced NHEJ events in BGN reporter mouse ES cells

|              | <i>H2AX</i> <sup>+/+</sup> |      | <i>H2AX</i> <sup>-/-</sup> |      | $\chi^2$ test  |
|--------------|----------------------------|------|----------------------------|------|----------------|
|              | Reads                      | %    | Reads                      | %    | <i>P</i> value |
| <b>Del</b>   | 931509                     | 69.2 | 711297                     | 51.9 | <0.0001        |
| <b>Ins</b>   | 292984                     | 21.8 | 550792                     | 40.1 | <0.0001        |
| <b>InDel</b> | 120837                     | 9.0  | 109350                     | 8.0  | <0.0001        |

**Supplementary Table 5.** Effect of *MDC1* status on paired gRNA-guided Cas9-induced NHEJ events at the *LDHA* locus of mouse ES cells

| <i>MDC1</i> status                        | Reads         |               | %NHEJ        |              | %Total reads |             | %Total<br>(normalized with TE) <sup>2</sup> |             | $\chi^2$ test     |
|-------------------------------------------|---------------|---------------|--------------|--------------|--------------|-------------|---------------------------------------------|-------------|-------------------|
|                                           | +/+           | -/-           | +/+          | -/-          | +/+          | -/-         | +/+                                         | -/-         |                   |
| <b>Total</b>                              | <b>951189</b> | <b>871778</b> | <b>-</b>     | <b>-</b>     | <b>100</b>   | <b>100</b>  |                                             |             |                   |
| <b>Total NHEJ<sup>1</sup></b>             | <b>803420</b> | <b>656228</b> | <b>100.0</b> | <b>100.0</b> | <b>84.5</b>  | <b>75.3</b> | <b>57.9</b>                                 | <b>43.8</b> | <b>&lt;0.0001</b> |
| Accurate NHEJ                             | 426764        | 427027        | 53.1         | 65.1         | 44.9         | 49.0        | 30.7                                        | 28.5        |                   |
| mNHEJ                                     | 376656        | 229201        | 46.9         | 34.9         | 39.6         | 26.3        | 27.1                                        | 15.3        | <0.0001           |
| <b>Individual cutting</b>                 | <b>114655</b> | <b>79071</b>  | <b>-</b>     | <b>-</b>     | <b>12.1</b>  | <b>9.1</b>  | <b>8.3</b>                                  | <b>5.3</b>  |                   |
| Del                                       | 82482         | 48727         | -            | -            | 8.7          | 5.6         | 5.9                                         | 3.2         |                   |
| Ins                                       | 3257          | 7134          | -            | -            | 0.3          | 0.8         | 0.2                                         | 0.5         |                   |
| InDel                                     | 28916         | 23210         | -            | -            | 3.0          | 2.7         | 2.1                                         | 1.5         |                   |
| <b>Simultaneous cutting<br/>(Group I)</b> | <b>688765</b> | <b>577157</b> | <b>100.0</b> | <b>100.0</b> | <b>72.4</b>  | <b>66.2</b> | <b>49.6</b>                                 | <b>38.5</b> | <b>&lt;0.0001</b> |
| Accurate NHEJ                             | 426764        | 427027        | 62.0         | 74.0         | 44.9         | 49.0        | 30.7                                        | 28.5        |                   |
| mNHEJ                                     | 262001        | 150130        | 38.0         | 26.0         | 27.5         | 17.2        | 18.9                                        | 10.0        | <0.0001           |
| Del                                       | 213546        | 100875        | 31.0         | 17.5         | 22.5         | 11.6        | 15.4                                        | 6.7         |                   |
| Ins                                       | 17357         | 24871         | 2.5          | 4.3          | 1.8          | 2.9         | 1.2                                         | 1.7         |                   |
| InDel                                     | 31098         | 24384         | 4.5          | 4.2          | 3.3          | 2.8         | 2.2                                         | 1.6         |                   |

<sup>1</sup>. Total NHEJ = Joining of one end of DSB and one end of the other DSB + Joining of two ends of individual DSB.

<sup>2</sup>. TE: transfection efficiency, which reflects the level of DSB induction in each cell line. Because transfection was done twice for site-specific induction of DSBs, %Total is normalized with TE twice and equals (%Total reads / TE) / 2.

**Supplementary Table 6.** Effect of *H2AX* status on paired gRNA-guided Cas9-induced NHEJ events at the *LDHA* locus of mouse ES cells

| <i>H2AX</i> status                        | Reads          |                | %NHEJ        |              | %Total reads |              | %Total<br>(normalized with TE) <sup>2</sup> |              | $\chi^2$ test     |
|-------------------------------------------|----------------|----------------|--------------|--------------|--------------|--------------|---------------------------------------------|--------------|-------------------|
|                                           | +/+            | -/-            | +/+          | -/-          | +/+          | -/-          | +/+                                         | -/-          |                   |
| <b>Total</b>                              | <b>1676348</b> | <b>1510050</b> | <b>-</b>     | <b>-</b>     | <b>100.0</b> | <b>100.0</b> | <b>100.0</b>                                | <b>100.0</b> |                   |
| <b>Total NHEJ<sup>1</sup></b>             | <b>398845</b>  | <b>167938</b>  | <b>100.0</b> | <b>100.0</b> | <b>23.8</b>  | <b>11.1</b>  | <b>40.1</b>                                 | <b>18.2</b>  | <b>&lt;0.0001</b> |
| Accurate NHEJ                             | 118986         | 95194          | 29.8         | 56.7         | 7.1          | 6.3          | 12.0                                        | 10.3         | <0.0001           |
| mNHEJ                                     | 279859         | 72744          | 70.2         | 43.3         | 16.7         | 4.8          | 28.2                                        | 7.9          | <0.0001           |
| <b>Individual cutting</b>                 | <b>184854</b>  | <b>38562</b>   | <b>-</b>     | <b>-</b>     | <b>11.0</b>  | <b>2.6</b>   | <b>18.6</b>                                 | <b>4.2</b>   |                   |
| Del                                       | 126547         | 20870          | -            | -            | 7.5          | 1.4          | 12.7                                        | 2.3          |                   |
| Ins                                       | 12790          | 7019           | -            | -            | 0.8          | 0.5          | 1.3                                         | 0.8          |                   |
| InDel                                     | 45517          | 10673          | -            | -            | 2.7          | 0.7          | 4.6                                         | 1.2          |                   |
| <b>Simultaneous cutting<br/>(Group I)</b> | <b>213991</b>  | <b>129376</b>  | <b>100</b>   | <b>100</b>   | <b>12.8</b>  | <b>8.6</b>   | <b>21.5</b>                                 | <b>14.1</b>  | <b>&lt;0.0001</b> |
| Accurate NHEJ                             | 118986         | 95194          | 55.6         | 73.6         | 7.1          | 6.3          | 12.0                                        | 10.3         | <0.0001           |
| mNHEJ                                     | 95005          | 34182          | 44.4         | 26.4         | 5.7          | 2.3          | 9.6                                         | 3.7          | <0.0001           |
| Del                                       | 74428          | 19939          | 34.8         | 15.4         | 4.4          | 1.3          | 7.5                                         | 2.2          |                   |
| Ins                                       | 7916           | 9157           | 3.7          | 7.1          | 0.5          | 0.6          | 0.8                                         | 1.0          |                   |
| InDel                                     | 12661          | 5086           | 5.9          | 3.9          | 0.8          | 0.3          | 1.3                                         | 0.6          |                   |

<sup>1</sup>. Total NHEJ = Joining of one end of DSB and one end of the other DSB + Joining of two ends of individual DSB.

<sup>2</sup>. TE: transfection efficiency, which reflects the level of DSB induction in each cell line. Because transfection was done twice for site-specific induction of DSBs, %Total is normalized with TE twice and equals (%Total reads / TE) / 2.



**Supplementary Table 7.** Sequence list of gRNAs, PCR primers and siRNAs

| <b>sgRNA</b>       | <b>Sequence (5'-3')</b>                                         | <b>PAM</b> | <b>Length (bp)</b> |
|--------------------|-----------------------------------------------------------------|------------|--------------------|
| mRosa26-1          | CATCCACGCACCCCTGACCC                                            | AGG        | 20                 |
| mRosa26-2          | GGCTGCAGCATCAGTACAC                                             | AGG        | 19                 |
| mRosa26-3          | CCTAAGAATGAGAAAGGCAA                                            | AGG        | 20                 |
| mH2AX              | TCTACCTCGTACACTATGTC                                            | CGG        | 20                 |
| mDNA-PKcs-1        | TGTTGGCTACTGCAGCTGC                                             | AGG        | 19                 |
| mDNA-PKcs-2        | CAGACCGCTGCAGTGCTGC                                             | CGG        | 19                 |
| mATM-1             | ACAGAATTTTCGTTAGCTGG                                            | AGG        | 20                 |
| mATM-2             | TTGTGTGGGTTCTGATGGCA                                            | AGG        | 20                 |
| mLDHA-1            | AGCATCACCAAGTGCAGGCA                                            | AGG        | 20                 |
| mLDHA-2            | TAATATGCTAACACCTTGGT                                            | GGG        | 20                 |
| mMDC1-1            | AACTATCCAGTGGCTCCTT                                             | GGG        | 19                 |
| mMDC1-2            | AAGAGACGTAGCTGCCCTAT                                            | AGG        | 20                 |
| sGEJ2-1            | AGGGATAACAGGGTAATCCA                                            | TGG        | 20                 |
| sGEJ2-2            | ATAACAGGGTAATCCATGG                                             | TGG        | 19                 |
| sGEJ2-3            | TGGATTACCCTGTTATCCCT                                            | AGG        | 20                 |
| BGN4-1             | TTCTGCAGTCGACGGTACCG                                            | CGG        | 20                 |
| BGN4-2             | CCGTCGACTGCAGAATTCTA                                            | GGG        | 20                 |
| <b>PCR primers</b> | <b>Sequence (5'-3')</b>                                         |            |                    |
| BSD-F              | CTCAAGCTTAACTAAACCATGGCCAAGCCTTTGTCTCAAGAAG                     |            |                    |
| BSD-R              | AGAATTCCAGTAGGGATAACAGGGTAATGCCAGGTCCGCCCTCCC<br>ACACATAACCAGAG |            |                    |
| sGEJ-F             | CCGCGCTGTTCTCCTCTTC                                             |            |                    |
| sGEJ-R             | GCCGTACGTAAGGGTGGTCACGAGGGTGG                                   |            |                    |
| BGN-F              | GCTGGCAACCTGACTTGTATC                                           |            |                    |
| BGN-R              | GCTTGCCGGTGGTGCAGATG                                            |            |                    |
| mRosa26-F          | GAGCACAGGAACAATTGGC                                             |            |                    |
| mRosa26-R          | GAATCCGTGCAAGCCAAG                                              |            |                    |
| mLDHA-F            | CCACTGAGCCATCTATCTCTCC                                          |            |                    |
| mLDHA-R            | GGTGCAGACATAAGCGGGAGAA                                          |            |                    |
| mH2AX-F            | GCGTGTCCAGGGAGTTTATAAGG                                         |            |                    |
| mH2AX-R            | GTAGTGGCCTTTCCGCAGCAG                                           |            |                    |
| mATM-F             | TAGGTTGATCCCACAGGAGAG                                           |            |                    |
| mATM-R             | ATCCAGACAACCAAATGAGG                                            |            |                    |
| mDNA-PKcs-F        | GAGTGCAAACACCAATCTGTGATATCTCCG                                  |            |                    |
| mDNA-PKcs-R        | TTTTGTCAAGGTCCTATTGAGTTCAAGCGA                                  |            |                    |
| mMDC1-F            | GGAAATCATCACCTCATGGT                                            |            |                    |
| mMDC1-R            | ATAAATGGTTCTACCAACCC                                            |            |                    |
| qPCR-mP400-F       | CCAGATACAGCAGCTGATGAGCAG                                        |            |                    |
| qPCR-mP400-R       | TGTATGATGGAGAGCCATGCTC                                          |            |                    |
| qPCR-mActin-F      | TGAGCGCAAGTACTCTGTGTGGAT                                        |            |                    |
| qPCR-mActin-R      | ACTCATCGTACTCCTGCTTGCTGA                                        |            |                    |

| <b>siRNA targets</b> | <b>Sequence (5'-3')</b> |
|----------------------|-------------------------|
| mTRRAP-1             | GCACATGAAGGACCTCTTT     |
| mTRRAP-2             | GGAGATGAACTGAAAGCAA     |
| mTip60-1             | ACGGAAGGTGGAGGTGGTT     |
| mTip60-2             | GGCCAGTATATCCTAACT      |
| mP400-1              | GCGGTTGCCAAAGCTTCAA     |
| mP400-2              | GGAACCATCTGTCAGTGAA     |
